# Supplementary figures and images for: Caries Lesion Assessment Using 3D Virtual Models by Examiners with Different Degrees of Clinical Experience
Source: MDPI journal article supplement (doi:10.3390/medicina59122157), 2023-12-13

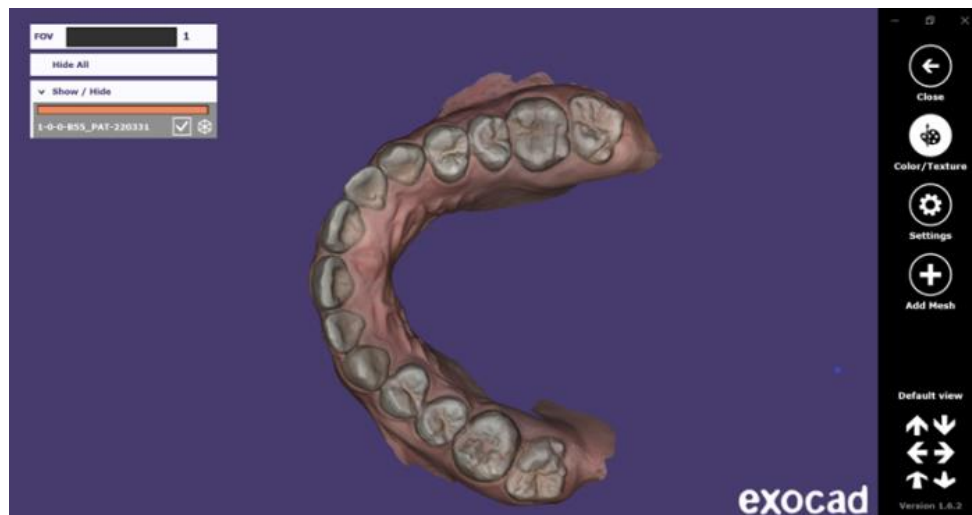

**Figure S1.** Virtual 3D model opened in Exocad Viewer.

Supplement: s1 [file s1]
